# Supplementary material for: Carbon fibres from renewable resources: the role of the lignin molecular structure in its blendability with biobased poly(ethylene terephthalate)
Source: Royal Society of Chemistry journal article supplement (doi:10.1039/c9gc02041a), 2019-01-01
Supplement: c9gc02041a1.pdf [file c9gc02041a1.pdf]

Supporting Information

**Carbon Fibre From Renewable Resources: The Role of Lignin Molecular Structure on its Blendability with Biobased Poly(Ethylene Terephthalate)**

Anne Beaucamp<sup>a</sup>, Yan Wang<sup>a,b</sup>, Mario Culebras<sup>a</sup> and Maurice N. Collins<sup>\*a</sup>

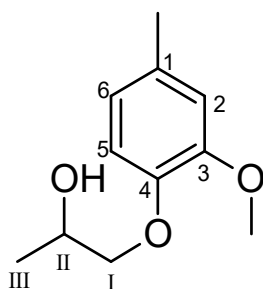

**Figure S1:** Chemical structure of a modified lignin unit

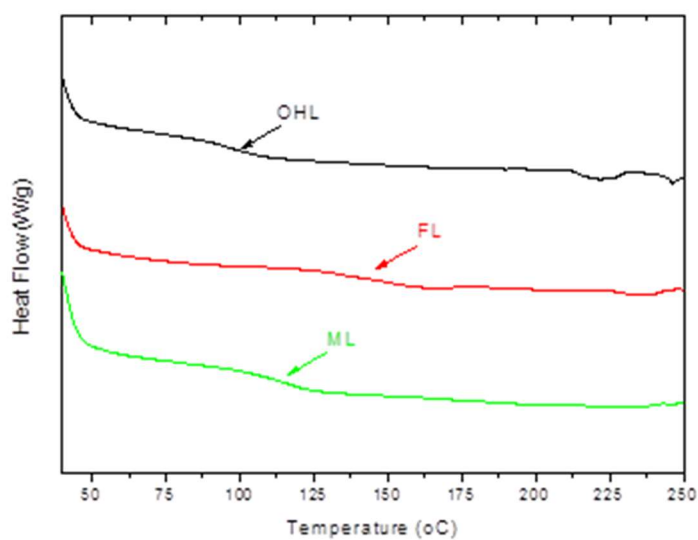

**Figure S2:** Glass transition temperature for OHL\*, FL and ML\* (Results from a previous study <sup>33</sup>)

**Table S1:** Molecular Weights ( $M_n$  and  $M_w$ ) and PolyDispersity Index (PDI) of the lignins examined in this work as determined by GPC and DSC analysis.

|     | $M_n$<br>(g.mol <sup>-1</sup> ) | $M_w$<br>(g.mol <sup>-1</sup> ) | PDI  | $T_g$<br>(°C) |
|-----|---------------------------------|---------------------------------|------|---------------|
| OHL | 842                             | 3952                            | 4.69 | 100           |
| FL  | 925                             | 6083                            | 6.57 | 150           |
| ML  | 2478                            | 11357                           | 4.58 | 110           |

**Table S2: Assignment of the FTIR resonance bands as according to Faix <sup>34</sup>**

| Band (cm <sup>-1</sup> ) | Chemical group                                                               |
|--------------------------|------------------------------------------------------------------------------|
| 3390-3460                | O-H stretching in Aromatic and Aliphatic groups                              |
| 3000-2840                | C-H stretching of methoxy groups, methyl and methylene groups in side chains |
| 1696                     | C=O stretching of conjugated aldehydes and carboxylic acids                  |
| 1599, 1514, 1424         | Aromatic skeletal vibrations                                                 |
| 1457                     | Aromatic methyl group vibrations                                             |
| 1370                     | Phenolic O-H Vibration                                                       |
| 1326                     | Stretching at the ring, S > G                                                |
| 1212                     | C-O stretching in ether linkage                                              |
| 1152, 1112               | Aromatic C-H in plane deformation                                            |
| 1030                     | Aliphatic O-H                                                                |
| 912, 826                 | Aromatic C-H out of plane                                                    |

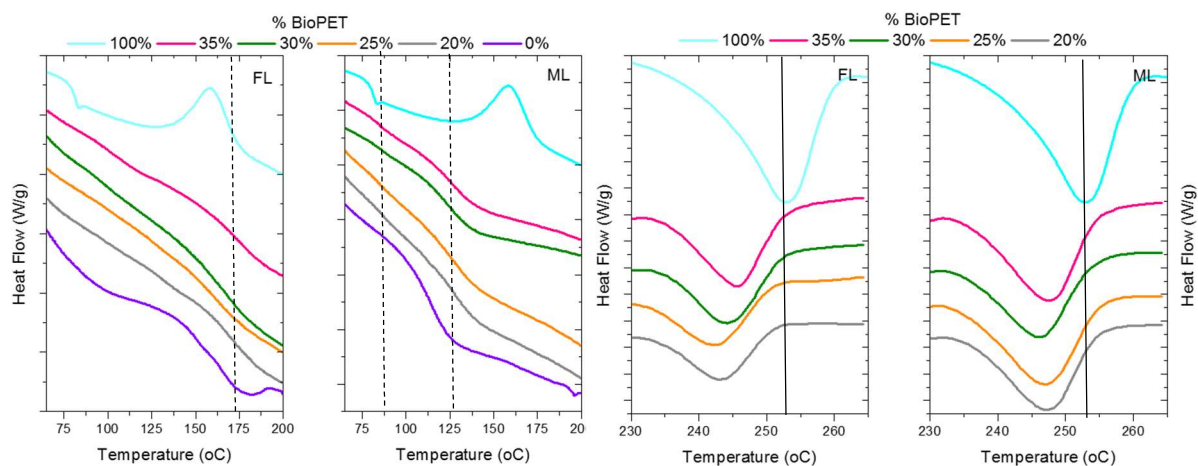

**Figure S3:** Evolution of the heat flow with temperature for FL and ML blends with BPET at various composition for the BPET melting transition.

**TableS3: Calculation of the Group Molar Attraction Constant  $\sum n_i F_i$  for OHL, ML and BPET repeat units**

|                    | $F_i^*$<br>((J.m <sup>3</sup> ) <sup>1/2</sup> . mol <sup>-1</sup> ) | OHL                    |                                                                             | FL                     |                                                                             | ML                     |                                                                             | BPET                   |                                                                             |
|--------------------|----------------------------------------------------------------------|------------------------|-----------------------------------------------------------------------------|------------------------|-----------------------------------------------------------------------------|------------------------|-----------------------------------------------------------------------------|------------------------|-----------------------------------------------------------------------------|
|                    |                                                                      | Number of groups $n_i$ | $\sum n_i F_i$<br>((J.m <sup>3</sup> ) <sup>1/2</sup> . mol <sup>-1</sup> ) | Number of groups $n_i$ | $\sum n_i F_i$<br>((J.m <sup>3</sup> ) <sup>1/2</sup> . mol <sup>-1</sup> ) | Number of groups $n_i$ | $\sum n_i F_i$<br>((J.m <sup>3</sup> ) <sup>1/2</sup> . mol <sup>-1</sup> ) | Number of groups $n_i$ | $\sum n_i F_i$<br>((J.m <sup>3</sup> ) <sup>1/2</sup> . mol <sup>-1</sup> ) |
| -CH <sub>3</sub>   | 0.3032                                                               | 0                      | 0                                                                           | 0                      | 0                                                                           | 2                      | 0.6064                                                                      | 0                      | 0                                                                           |
| -CH <sub>2</sub> - | 0.2689                                                               | 2                      | 0.5378                                                                      | 3                      | 0.8067                                                                      | 6                      | 1.6134                                                                      | 2                      | 0.5378                                                                      |
| >CH-               | 0.1758                                                               | 4                      | 0.7032                                                                      | 6                      | 1.0548                                                                      | 4                      | 0.7032                                                                      | 0                      | 0                                                                           |
| =CH-               | 0.2485                                                               | 0                      | 0                                                                           | 0                      | 0                                                                           | 0                      | 0                                                                           | 0                      | 0                                                                           |
| -O-CH <sub>3</sub> | 0.236                                                                | 3                      | 0.708                                                                       | 4                      | 0.944                                                                       | 3                      | 0.708                                                                       | 0                      | 0                                                                           |
| -COO-              | 0.6677                                                               | 0                      | 0                                                                           | 0                      | 0                                                                           | 0                      | 0                                                                           | 2                      | 1.3354                                                                      |
| -O-                | 0.2351                                                               | 2                      | 0.4702                                                                      | 3                      | 0.7053                                                                      | 4                      | 0.9404                                                                      | 0                      | 0                                                                           |
| Aromatic CH        | 0.2395                                                               | 5                      | 1.1975                                                                      | 7                      | 1.6765                                                                      | 5                      | 1.1975                                                                      | 4                      | 0.958                                                                       |
| Aromatic C         | 0.2006                                                               | 7                      | 1.4042                                                                      | 11                     | 2.2066                                                                      | 7                      | 1.4042                                                                      | 2                      | 0.4012                                                                      |
| Aromatic Meta      | 0.0135                                                               | 3                      | 0.0405                                                                      | 5                      | 0.0675                                                                      | 3                      | 0.0405                                                                      | 0                      | 0                                                                           |
| Aromatic Para      | 0.0825                                                               | 2                      | 0.165                                                                       | 3                      | 0.2475                                                                      | 2                      | 0.165                                                                       | 1                      | 0.0825                                                                      |
| 6-Membered Ring    | -0.0479                                                              | 2                      | -0.0958                                                                     | 3                      | -0.1437                                                                     | 2                      | -0.0958                                                                     | 1                      | -0.0479                                                                     |
| -OH aromatic       | 0.3496                                                               | 0                      | 0                                                                           | 0                      | 0                                                                           | 0                      | 0                                                                           | 0                      | 0                                                                           |
| -OH aliphatic      | 0.4617                                                               | 4                      | 1.8468                                                                      | 5                      | 2.3085                                                                      | 2                      | 0.9234                                                                      | 0                      | 0                                                                           |
|                    |                                                                      | <b>6.9774</b>          |                                                                             | <b>9.8737</b>          |                                                                             | <b>8.2062</b>          |                                                                             | <b>3.267</b>           |                                                                             |

\*  $F_i$  values adapted from [1].

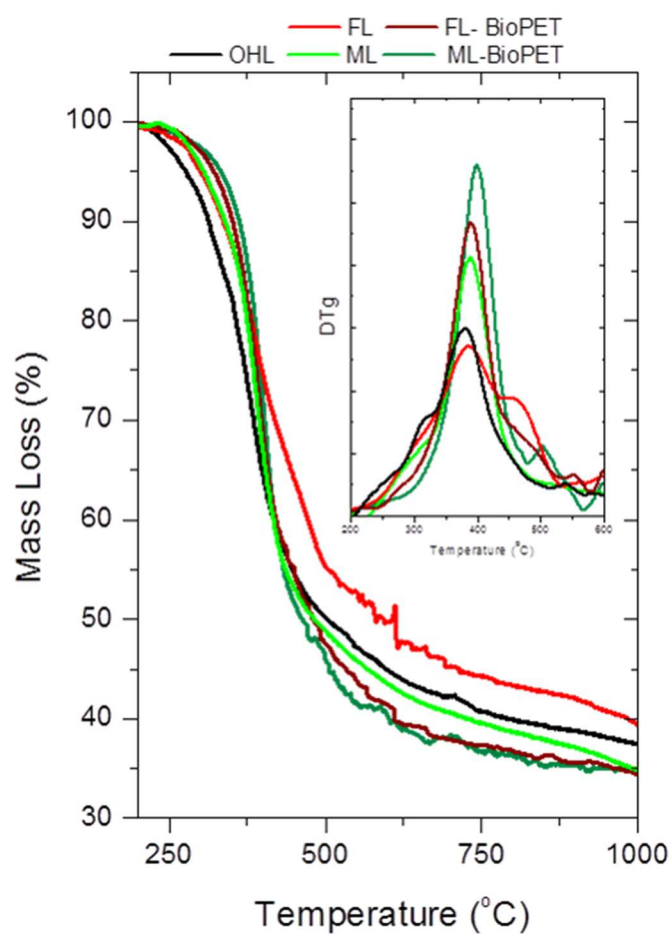

**Figure S4:** Mass Loss and derivative Mass in function of temperature for the lignins and blends

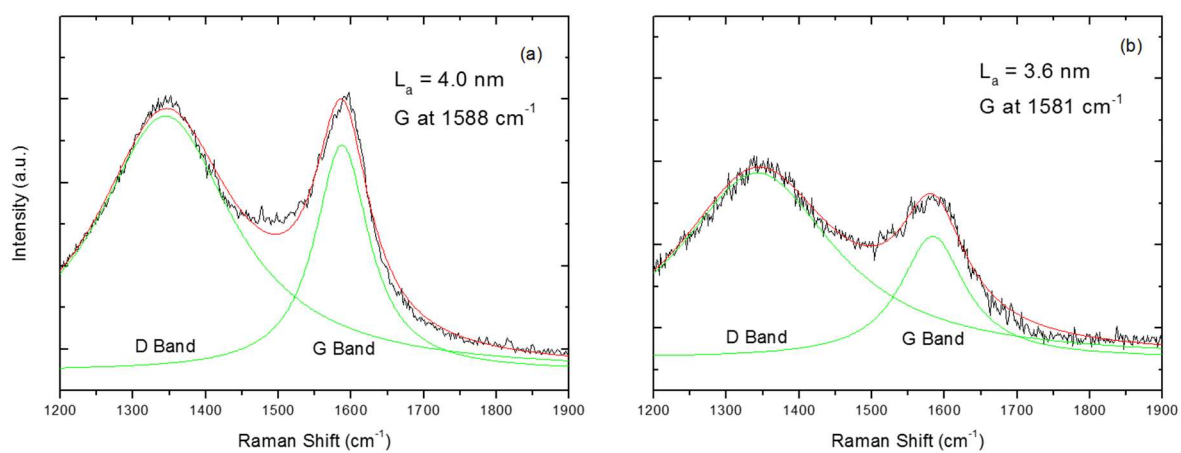

**Figure S5:** Raman spectra for 75%FL-25%BPET (a) and 75%ML-25%BPET (b). The D and G peaks (green) were deconvoluted using a Lorentz function. The sum of the 2 is marked in red.
